# Supplementary material for: Precision and Accuracy of Field Versus Laboratory Bioassay Insecticide Efficacy for the Control of Immature Bemisia tabaci
Source: MDPI journal article supplement (doi:10.3390/insects14070645), 2023-07-18
Supplement: s1 [file s1]

**Supl. Table S1.** Laboratory and field counts ( $\pm$  SD) of *Bemisia tabaci* immatures at seven days after treatment with different insecticides, Coastal Plain Experiment Station, Tifton, GA, 2021-2022.

| Crop                           | Treatment        | Eggs                           |                    | Nymphs              |                    |
|--------------------------------|------------------|--------------------------------|--------------------|---------------------|--------------------|
|                                |                  | Bioassay <sup>1</sup>          | Field              | Bioassay            | Field              |
|                                |                  | Avg. $\pm$ SD dif <sup>2</sup> | Avg. $\pm$ SD      | Avg. $\pm$ SD       | Avg. $\pm$ SD      |
| Squash #1<br>2021<br>n=88      | Check            | 47.75 $\pm$ 18.07 a            | 14.18 $\pm$ 8.94 a | 60.75 $\pm$ 22.71 a | 4.73 $\pm$ 3.49 a  |
|                                | Pyriproxyfen     | 45.75 $\pm$ 10.26 a            | 0.95 $\pm$ 0.66 b  | 1.25 $\pm$ 0.75 b   | 0.30 $\pm$ 0.60 a  |
|                                | Clothianidin     | 7.25 $\pm$ 3.92 b              | 2.18 $\pm$ 3.50 b  | 15.25 $\pm$ 9.12 ab | 0.67 $\pm$ 0.94 a  |
|                                | Spiromesifen     | 17.25 $\pm$ 6.33 b             | 1.20 $\pm$ 1.28 b  | 10.50 $\pm$ 8.62 b  | 3.55 $\pm$ 6.33 a  |
|                                | Flonicamid       | 6.50 $\pm$ 5.55 b              | 0.40 $\pm$ 0.80 b  | 13.25 $\pm$ 13.25 b | 1.40 $\pm$ 1.41 a  |
|                                | Sulfoxaflor      | 6.25 $\pm$ 3.17 b              | 1.40 $\pm$ 1.49 b  | 10.00 $\pm$ 3.63 b  | 0.95 $\pm$ 1.77 a  |
|                                | Imidacloprid     | 5.75 $\pm$ 2.95 b              | 1.95 $\pm$ 3.77 b  | 4.25 $\pm$ 2.66 b   | 1.10 $\pm$ 1.24 a  |
|                                | Acetamiprid      | 0.75 $\pm$ 0.75 b              | 1.20 $\pm$ 1.25 b  | 1.50 $\pm$ 0.87 b   | 0.48 $\pm$ 0.76 a  |
|                                | Cyantraniliprole | 1.50 $\pm$ 0.96 b              | 2.60 $\pm$ 3.27 b  | 1.00 $\pm$ 0.71 b   | 2.00 $\pm$ 1.10 a  |
|                                | Flupyradifurone  | 0.75 $\pm$ 0.48 b              | 0.40 $\pm$ 0.54 b  | 1.50 $\pm$ 0.96 b   | 0.95 $\pm$ 1.00 a  |
| Cucumber<br>#1<br>2021<br>n=88 | Dinotefuran      | 5.75 $\pm$ 5.11 b              | 0.85 $\pm$ 0.81 b  | 0.75 $\pm$ 0.75 b   | 2.70 $\pm$ 3.04 a  |
|                                | Check            | 8.00 $\pm$ 1.47 a              | 13.00 $\pm$ 2.67 a | 3.75 $\pm$ 1.75 a   | 6.25 $\pm$ 4.27 a  |
|                                | Pyriproxyfen     | 0.25 $\pm$ 0.25 b              | 2.70 $\pm$ 0.90 b  | 0.00 $\pm$ 0.00 b   | 0.50 $\pm$ 1.00 b  |
|                                | Clothianidin     | 2.00 $\pm$ 1.08 b              | 1.65 $\pm$ 0.50 b  | 0.50 $\pm$ 0.50 b   | 1.25 $\pm$ 1.50 b  |
|                                | Spiromesifen     | 0.00 $\pm$ 0.00 b              | 2.10 $\pm$ 0.99 b  | 0.00 $\pm$ 0.00 b   | 1.25 $\pm$ 0.50 b  |
|                                | Flonicamid       | 1.75 $\pm$ 1.75 b              | 2.15 $\pm$ 0.82 b  | 2.50 $\pm$ 2.50 a   | 1.00 $\pm$ 0.82 b  |
|                                | Sulfoxaflor      | 1.25 $\pm$ 0.75 b              | 2.95 $\pm$ 1.34 b  | 0.25 $\pm$ 0.25 b   | 1.25 $\pm$ 0.50 b  |
|                                | Imidacloprid     | 0.00 $\pm$ 0.00 b              | 0.75 $\pm$ 0.66 b  | 0.00 $\pm$ 0.00 b   | 1.25 $\pm$ 0.96 b  |
|                                | Acetamiprid      | 0.00 $\pm$ 0.00 b              | 2.15 $\pm$ 0.60 b  | 0.00 $\pm$ 0.00 b   | 0.75 $\pm$ 0.96 b  |
|                                | Cyantraniliprole | 0.00 $\pm$ 0.00 b              | 0.95 $\pm$ 0.68 b  | 0.00 $\pm$ 0.00 b   | 1.00 $\pm$ 1.15 b  |
| Squash #2<br>2021<br>n=88      | Flupyradifurone  | 0.00 $\pm$ 0.00 b              | 1.15 $\pm$ 1.52 b  | 0.00 $\pm$ 0.00 b   | 0.75 $\pm$ 0.96 b  |
|                                | Dinotefuran      | 0.00 $\pm$ 0.00 b              | 0.74 $\pm$ 1.11 b  | 0.00 $\pm$ 0.00 b   | 0.50 $\pm$ 0.58 b  |
|                                | Check            | 63.25 $\pm$ 22.46 a            | 10.25 $\pm$ 3.97 a | 96.75 $\pm$ 39.82 a | 4.85 $\pm$ 2.50 a  |
|                                | Pyriproxyfen     | 21.50 $\pm$ 6.51 abc           | 1.30 $\pm$ 1.25 c  | 6.00 $\pm$ 2.27 b   | 0.85 $\pm$ 1.14 b  |
|                                | Clothianidin     | 25.00 $\pm$ 4.95 ab            | 5.95 $\pm$ 2.58 ab | 31.50 $\pm$ 5.06 ab | 2.30 $\pm$ 0.66 ab |
|                                | Spiromesifen     | 14.50 $\pm$ 7.69 bc            | 5.60 $\pm$ 2.92 ab | 19.50 $\pm$ 14.66 b | 2.00 $\pm$ 2.02 ab |
|                                | Flonicamid       | 16.00 $\pm$ 2.48 bc            | 2.00 $\pm$ 0.86 bc | 20.75 $\pm$ 7.64 b  | 2.60 $\pm$ 2.66 ab |
|                                | Sulfoxaflor      | 9.00 $\pm$ 3.74 bc             | 4.15 $\pm$ 1.10 bc | 13.00 $\pm$ 4.53 b  | 2.75 $\pm$ 0.97 ab |
|                                | Imidacloprid     | 8.00 $\pm$ 2.35 bc             | 2.25 $\pm$ 1.49 bc | 1.50 $\pm$ 0.96 b   | 0.65 $\pm$ 0.79 b  |
|                                | Acetamiprid      | 5.50 $\pm$ 2.25 bc             | 3.50 $\pm$ 1.54 bc | 10.75 $\pm$ 5.47 b  | 0.80 $\pm$ 0.59 b  |

|                                |                  |                    |                   |                   |                   |
|--------------------------------|------------------|--------------------|-------------------|-------------------|-------------------|
|                                | Cyantraniliprole | 2.00 ± 0.71 bc     | 1.25 ± 0.41 c     | 3.25 ± 1.44 b     | 1.95 ± 1.44 ab    |
|                                | Flupyradifurone  | 6.25 ± 1.80 bc     | 4.60 ± 1.98 abc   | 14.25 ± 5.07 b    | 1.80 ± 1.34 ab    |
|                                | Dinotefuran      | 1.50 ± 0.65 c      | 1.15 ± 0.91 c     | 2.00 ± 2.00 b     | 1.10 ± 0.82 ab    |
| Cucumber<br>#2<br>2021<br>n=88 | Check            | 81.00 ± 11.35 a    | 3.25 ± 1.06 a     | 125.75 ± 30.32 a  | 0.75 ± 0.57 a     |
|                                | Pyriproxyfen     | 50.50 ± 3.07 ab    | 1.80 ± 1.07 abc   | 7.00 ± 2.16 cd    | 0.60 ± 0.54 a     |
|                                | Clothianidin     | 30.75 ± 5.31 bc    | 0.25 ± 0.10 c     | 73.50 ± 15.55 ab  | 0.15 ± 0.30 a     |
|                                | Spiromesifen     | 12.25 ± 3.57 cd    | 1.30 ± 0.50 abc   | 28.75 ± 10.01 bcd | 0.35 ± 0.25 a     |
|                                | Flonicamid       | 31.75 ± 4.53 bc    | 0.50 ± 0.12 c     | 41.50 ± 6.30 bc   | 0.10 ± 0.12 a     |
|                                | Sulfoxaflor      | 17.50 ± 2.99 cd    | 1.80 ± 0.67 abc   | 22.75 ± 4.09 bcd  | 0.40 ± 0.28 a     |
|                                | Imidacloprid     | 22.25 ± 4.61 cd    | 0.40 ± 0.28 c     | 39.75 ± 8.56 bc   | 0.20 ± 0.23 a     |
|                                | Acetamiprid      | 15.25 ± 3.09 cd    | 2.70 ± 1.89 ab    | 22.00 ± 3.63 bcd  | 0.65 ± 0.50 a     |
|                                | Cyantraniliprole | 7.25 ± 2.66 de     | 0.80 ± 0.52 bc    | 16.25 ± 7.49 cd   | 0.15 ± 0.19 a     |
|                                | Flupyradifurone  | 13.50 ± 4.37 cd    | 0.40 ± 0.43 c     | 17.50 ± 6.99 cd   | 0.15 ± 0.19 a     |
|                                | Dinotefuran      | 1.00 ± 1.00 e      | 0.55 ± 0.62 c     | 3.25 ± 3.25 d     | 0.15 ± 0.19 a     |
| Squash #3<br>2022<br>n=88      | Check            | 79.25 ± 33.04 abc  | 360.55 ± 145.01 a | 58.00 ± 34.09 a   | 159.45 ± 37.48 a  |
|                                | Pyriproxyfen     | 103.50 ± 15.76 a   | 276.80 ± 103.57 a | 1.25 ± 0.63 b     | 103.40 ± 21.79 a  |
|                                | Clothianidin     | 62.75 ± 32.19 abcd | 243.15 ± 80.52 a  | 45.75 ± 20.05 a   | 120.40 ± 29.46 a  |
|                                | Spiromesifen     | 17.50 ± 10.52 bcd  | 223.65 ± 73.74 a  | 17.50 ± 5.87 ab   | 126.00 ± 17.39 a  |
|                                | Flonicamid       | 86.25 ± 26.88 ab   | 247.55 ± 90.18 a  | 30.75 ± 12.50 ab  | 132.00 ± 18.51 a  |
|                                | Sulfoxaflor      | 4.00 ± 1.58 d      | 285.00 ± 134.11 a | 0.25 ± 0.25 b     | 125.35 ± 10.58 a  |
|                                | Imidacloprid     | 23.75 ± 7.86 abcd  | 240.80 ± 86.67 a  | 39.50 ± 8.07 a    | 134.95 ± 21.76 a  |
|                                | Acetamiprid      | 5.25 ± 0.48 cd     | 229.30 ± 26.67 a  | 0.75 ± 0.48 b     | 124.35 ± 32.18 a  |
|                                | Cyantraniliprole | 1.75 ± 1.03 d      | 230.70 ± 35.72 a  | 0.00 ± 0.00 b     | 111.25 ± 20.83 a  |
|                                | Flupyradifurone  | 6.50 ± 3.18 cd     | 164.20 ± 76.02 a  | 1.50 ± 0.65 b     | 103.10 ± 33.38 a  |
|                                | Dinotefuran      | 1.25 ± 0.48 d      | 169.10 ± 86.46 a  | 0.25 ± 0.25 b     | 100.90 ± 21.66 a  |
| Cucumber<br>#3<br>2022<br>n=88 | Check            | 31.25 ± 3.47 a     | 115.80 ± 53.99 a  | 69.75 ± 6.46 a    | 13.45 ± 3.04 a    |
|                                | Pyriproxyfen     | 6.75 ± 1.70 bc     | 89.10 ± 22.08 a   | 1.25 ± 0.48 f     | 6.75 ± 6.88 a     |
|                                | Clothianidin     | 11.00 ± 1.87 b     | 100.65 ± 39.93 a  | 29.25 ± 4.82 b    | 8.70 ± 4.45 a     |
|                                | Spiromesifen     | 7.25 ± 0.95 bc     | 60.95 ± 32.27 a   | 15.75 ± 1.25 bcd  | 5.45 ± 4.74 a     |
|                                | Flonicamid       | 8.75 ± 1.44 bc     | 89.55 ± 30.92 a   | 25.00 ± 3.85 bc   | 11.95 ± 5.94 a    |
|                                | Sulfoxaflor      | 6.75 ± 1.31 bc     | 107.35 ± 75.55 a  | 13.75 ± 2.39 cd   | 5.80 ± 3.70 a     |
|                                | Imidacloprid     | 11.00 ± 1.58 b     | 99.20 ± 58.76 a   | 28.25 ± 4.96 bc   | 8.05 ± 5.32 a     |
|                                | Acetamiprid      | 7.00 ± 1.47 bc     | 58.65 ± 17.24 a   | 9.75 ± 1.60 de    | 3.65 ± 1.91 a     |
|                                | Cyantraniliprole | 7.75 ± 1.89 bc     | 28.10 ± 12.69 a   | 8.75 ± 1.03 de    | 4.40 ± 4.08 a     |
|                                | Flupyradifurone  | 7.75 ± 1.38 bc     | 60.95 ± 20.47 a   | 14.50 ± 3.71 bcd  | 6.05 ± 4.42 a     |
|                                | Dinotefuran      | 3.25 ± 0.48 c      | 74.45 ± 43.11 a   | 3.00 ± 0.71 ef    | 3.80 ± 2.41 a     |
| Squash #4                      | Check            | 68.25 ± 18.43 a    | 508.00 ± 167.48 a | 21.75 ± 5.59 a    | 189.80 ± 225.66 a |

|                                |                  |                    |                   |                  |                   |
|--------------------------------|------------------|--------------------|-------------------|------------------|-------------------|
| 2022<br>n=88                   | Pyriproxyfen     | 51.50 ± 11.99 abc  | 727.33 ± 340.85 a | 9.50 ± 1.85 abcd | 527.73 ± 493.63 a |
|                                | Clothianidin     | 44.75 ± 10.82 abc  | 359.93 ± 158.37 a | 15.75 ± 1.65 ab  | 121.20 ± 125.28 a |
|                                | Spiromesifen     | 46.00 ± 12.46 abc  | 495.40 ± 202.52 a | 17.00 ± 3.03 ab  | 282.20 ± 212.24 a |
|                                | Flonicamid       | 55.75 ± 12.01 ab   | 418.05 ± 171.49 a | 20.00 ± 4.71 a   | 196.65 ± 269.43 a |
|                                | Sulfoxaflor      | 47.25 ± 10.81 abc  | 442.20 ± 84.29 a  | 15.00 ± 2.35 ab  | 157.35 ± 136.27 a |
|                                | Imidacloprid     | 38.00 ± 11.48 abcd | 589.70 ± 238.75 a | 13.25 ± 3.35 abc | 239.40 ± 121.19 a |
|                                | Acetamiprid      | 17.25 ± 5.45 abc   | 433.10 ± 301.28 a | 5.50 ± 0.96 bcd  | 205.90 ± 336.38 a |
|                                | Cyantraniliprole | 7.50 ± 1.44 d      | 556.25 ± 238.85 a | 3.50 ± 0.65 cd   | 375.35 ± 274.01 a |
|                                | Flupyradifurone  | 11.25 ± 2.02 d     | 383.05 ± 143.75 a | 4.00 ± 1.08 cd   | 201.80 ± 158.47 a |
|                                | Dinotefuran      | 6.75 ± 1.89 d      | 429.13 ± 90.70 a  | 3.00 ± 1.47 d    | 303.47 ± 21.35 a  |
| Cucumber<br>#4<br>2022<br>n=88 | Check            | 67.75 ± 12.99 a    | 183.80 ± 57.99 a  | 14.50 ± 1.55 a   | 54.25 ± 39.21 a   |
|                                | Pyriproxyfen     | 55.75 ± 14.63 ab   | 73.25 ± 18.38 b   | 5.50 ± 2.22 bc   | 13.30 ± 5.33 b    |
|                                | Clothianidin     | 50.00 ± 13.07 abc  | 123.35 ± 84.92 ab | 10.25 ± 1.38 ab  | 31.80 ± 15.62 ab  |
|                                | Spiromesifen     | 39.25 ± 1.60 abc   | 94.00 ± 30.93 ab  | 7.50 ± 0.96 abc  | 22.26 ± 13.93 ab  |
|                                | Flonicamid       | 55.50 ± 6.65 a     | 80.05 ± 40.05 ab  | 11.00 ± 1.83 ab  | 19.65 ± 8.96 ab   |
|                                | Sulfoxaflor      | 45.25 ± 9.58 abc   | 123.10 ± 48.50 ab | 8.00 ± 1.83 abc  | 23.30 ± 10.77 ab  |
|                                | Imidacloprid     | 33.00 ± 6.35 abc   | 87.70 ± 27.99 ab  | 6.75 ± 1.03 abc  | 18.25 ± 3.79 ab   |
|                                | Acetamiprid      | 29.75 ± 12.80 abc  | 104.40 ± 39.62 ab | 8.25 ± 0.63 abc  | 17.80 ± 2.93 ab   |
|                                | Cyantraniliprole | 13.50 ± 2.50 c     | 80.55 ± 20.29 ab  | 2.25 ± 0.85 c    | 14.05 ± 6.66 b    |
|                                | Flupyradifurone  | 23.25 ± 4.82 abc   | 99.05 ± 23.74 ab  | 3.00 ± 0.71 c    | 9.25 ± 3.99 b     |
|                                | Dinotefuran      | 14.00 ± 2.65 bc    | 62.15 ± 6.37 b    | 2.50 ± 1.04 c    | 12.60 ± 6.22 b    |

<sup>1</sup> Bioassay counts after one week following adult oviposition for 48 h in a treated cotton leaf

<sup>2</sup> Means followed by the same letter within each column are not significantly different ( $P < 0.05$ , Tukey's test). To account for natural null values in the dataset, a square root transformation ( $\sqrt{x+1}$ ) was performed prior to conducting the analysis.

**Supl. Table S2.** Precision (CV%) and accuracy (RMSE and MAE) of insecticide efficacy estimates on *Bemisia tabaci* immatures at seven days after treatment with different insecticides, Coastal Plain Experiment Station, Tifton, GA, 2021-2022.

| Crop                | Treatment        | Eggs       |              |       |       | Nymphs |        |       |       |
|---------------------|------------------|------------|--------------|-------|-------|--------|--------|-------|-------|
|                     |                  | Lab CV (%) | Field CV (%) | RMSE  | MAE   | Lab    | Field  | RMSE  | MAE   |
| Squash #1<br>n=88   | Check            | 37.85      | 63.10        | 0.130 | 0.100 | 37.38  | 73.83  | 0.223 | 0.188 |
|                     | Pyriproxyfen     | 22.42      | 69.56        | 0.477 | 0.446 | 60.00  | 200.00 | 0.035 | 0.021 |
|                     | Clothianidin     | 54.12      | 160.42       | 0.159 | 0.127 | 59.82  | 141.42 | 0.098 | 0.071 |
|                     | Spiromesifen     | 36.69      | 106.28       | 0.161 | 0.137 | 82.07  | 178.18 | 0.357 | 0.189 |
|                     | Flonicamid       | 85.31      | 200.00       | 0.126 | 0.083 | 100.00 | 101.02 | 0.115 | 0.091 |
|                     | Sulfoxaflor      | 50.75      | 106.27       | 0.068 | 0.056 | 36.29  | 186.23 | 0.115 | 0.093 |
|                     | Imidacloprid     | 51.38      | 193.22       | 0.136 | 0.103 | 62.53  | 112.57 | 0.069 | 0.051 |
|                     | Acetamiprid      | 100.00     | 104.33       | 0.053 | 0.037 | 57.74  | 157.42 | 0.047 | 0.029 |
|                     | Cyantraniliprole | 63.83      | 125.93       | 0.124 | 0.081 | 70.71  | 54.77  | 0.159 | 0.146 |
|                     | Flupyradifurone  | 63.83      | 135.40       | 0.120 | 0.079 | 63.83  | 105.09 | 0.093 | 0.063 |
| Cucumber #1<br>n=88 | Dinotefuran      | 88.79      | 94.85        | 0.094 | 0.062 | 100.00 | 112.58 | 0.279 | 0.202 |
|                     | Check            | 18.40      | 20.56        | 0.199 | 0.177 | 46.67  | 68.35  | 0.615 | 0.546 |
|                     | Pyriproxyfen     | 100.00     | 33.40        | 0.169 | 0.162 | .      | 200.00 | .     | .     |
|                     | Clothianidin     | 54.01      | 30.30        | 0.159 | 0.112 | 100.00 | 120.00 | 0.087 | 0.054 |
|                     | Spiromesifen     | .          | 46.98        | .     | .     | .      | 40.00  | .     | .     |
|                     | Flonicamid       | 100.00     | 38.26        | 0.236 | 0.197 | 100.00 | 81.65  | 0.468 | 0.292 |
|                     | Sulfoxaflor      | 60.00      | 45.44        | 0.108 | 0.088 | 100.00 | 40.00  | 0.079 | 0.079 |
|                     | Imidacloprid     | .          | 88.11        | .     | .     | .      | 76.59  | .     | .     |
|                     | Acetamiprid      | .          | 27.78        | .     | .     | .      | 127.66 | .     | .     |
|                     | Cyantraniliprole | .          | 71.65        | .     | .     | .      | 115.47 | .     | .     |
| Squash #2<br>n=88   | Flupyradifurone  | .          | 131.97       | .     | .     | .      | 127.66 | .     | .     |
|                     | Dinotefuran      | .          | 148.27       | .     | .     | .      | 115.47 | .     | .     |
|                     | Check            | 35.51      | 38.78        | 0.432 | 0.394 | 41.16  | 51.55  | 0.218 | 0.162 |
|                     | Pyriproxyfen     | 30.29      | 96.08        | 0.134 | 0.105 | 37.88  | 133.62 | 0.140 | 0.097 |
|                     | Clothianidin     | 19.80      | 43.43        | 0.193 | 0.160 | 16.06  | 28.84  | 0.152 | 0.147 |
|                     | Spiromesifen     | 53.01      | 52.16        | 0.235 | 0.227 | 75.18  | 101.00 | 0.215 | 0.167 |
|                     | Flonicamid       | 15.52      | 43.21        | 0.040 | 0.031 | 36.83  | 94.94  | 0.358 | 0.283 |
|                     | Sulfoxaflor      | 41.57      | 26.51        | 0.200 | 0.183 | 34.83  | 35.32  | 0.307 | 0.298 |
|                     | Imidacloprid     | 29.32      | 66.16        | 0.096 | 0.073 | 63.83  | 121.46 | 0.113 | 0.078 |

|                      |                  |        |        |       |       |        |        |       |       |
|----------------------|------------------|--------|--------|-------|-------|--------|--------|-------|-------|
|                      | Acetamiprid      | 40.99  | 44.14  | 0.189 | 0.172 | 50.86  | 73.60  | 0.062 | 0.052 |
|                      | Cyantraniliprole | 35.36  | 32.99  | 0.063 | 0.061 | 44.19  | 73.66  | 0.284 | 0.241 |
|                      | Flupyradifurone  | 28.75  | 43.04  | 0.144 | 0.115 | 35.60  | 74.26  | 0.060 | 0.049 |
|                      | Dinotefuran      | 43.03  | 79.54  | 0.080 | 0.072 | 100.00 | 74.97  | 0.156 | 0.135 |
| Cucumbe<br>r #2 n=88 | Check            | 14.01  | 32.71  | 0.196 | 0.172 | 24.11  | 76.59  | 0.151 | 0.127 |
|                      | Pyriproxyfen     | 6.08   | 59.49  | 0.184 | 0.140 | 30.86  | 90.27  | 0.439 | 0.342 |
|                      | Clothianidin     | 17.28  | 40.00  | 0.248 | 0.238 | 21.15  | 200.00 | 0.274 | 0.255 |
|                      | Spiromesifen     | 29.13  | 38.72  | 0.176 | 0.155 | 34.82  | 71.90  | 0.100 | 0.082 |
|                      | Flonicamid       | 14.28  | 23.09  | 0.203 | 0.195 | 15.19  | 115.47 | 0.141 | 0.134 |
|                      | Sulfoxaflor      | 17.06  | 37.41  | 0.242 | 0.210 | 17.98  | 70.71  | 0.189 | 0.173 |
|                      | Imidacloprid     | 20.71  | 70.71  | 0.129 | 0.127 | 21.53  | 115.47 | 0.100 | 0.082 |
|                      | Acetamiprid      | 20.28  | 70.14  | 0.515 | 0.419 | 16.49  | 76.92  | 0.386 | 0.330 |
|                      | Cyantraniliprole | 36.66  | 64.55  | 0.148 | 0.109 | 46.08  | 127.66 | 0.051 | 0.036 |
|                      | Flupyradifurone  | 32.36  | 108.01 | 0.321 | 0.280 | 39.97  | 127.66 | 0.546 | 0.524 |
|                      | Dinotefuran      | 100.00 | 112.57 | 0.154 | 0.105 | 100.00 | 127.66 | 0.113 | 0.078 |
| Squash #3<br>n=88    | Check            | 41.69  | 40.22  | 0.246 | 0.160 | 58.77  | 23.51  | 0.616 | 0.529 |
|                      | Pyriproxyfen     | 15.22  | 37.42  | 0.254 | 0.189 | 50.33  | 21.08  | 0.536 | 0.527 |
|                      | Clothianidin     | 51.30  | 33.11  | 0.420 | 0.395 | 43.83  | 24.47  | 0.381 | 0.335 |
|                      | Spiromesifen     | 60.14  | 32.97  | 0.356 | 0.321 | 33.52  | 13.80  | 0.556 | 0.541 |
|                      | Flonicamid       | 31.16  | 36.43  | 0.355 | 0.266 | 40.65  | 14.02  | 0.534 | 0.489 |
|                      | Sulfoxaflor      | 39.53  | 47.05  | 0.583 | 0.537 | 100.00 | 8.44   | 0.648 | 0.647 |
|                      | Imidacloprid     | 33.08  | 35.99  | 0.356 | 0.311 | 20.42  | 16.13  | 0.452 | 0.449 |
|                      | Acetamiprid      | 9.12   | 11.63  | 0.420 | 0.418 | 63.83  | 25.88  | 0.654 | 0.638 |
|                      | Cyantraniliprole | 58.90  | 15.48  | 0.450 | 0.445 | .      | 18.73  | .     | .     |
|                      | Flupyradifurone  | 48.85  | 46.30  | 0.124 | 0.097 | 43.03  | 32.38  | 0.206 | 0.152 |
|                      | Dinotefuran      | 38.30  | 51.13  | 0.361 | 0.327 | 100.00 | 21.47  | 0.529 | 0.520 |
| Cucumbe<br>r #3 n=88 | Check            | 19.17  | 31.55  | 0.437 | 0.402 | 10.72  | 72.28  | 0.287 | 0.215 |
|                      | Pyriproxyfen     | 26.24  | 25.09  | 0.253 | 0.237 | 40.32  | 40.06  | 0.458 | 0.341 |
|                      | Clothianidin     | 26.14  | 68.84  | 0.288 | 0.185 | 13.43  | 49.11  | 0.292 | 0.262 |
|                      | Spiromesifen     | 4.08   | 32.90  | 0.162 | 0.151 | 12.77  | 62.58  | 0.256 | 0.186 |
|                      | Flonicamid       | 11.99  | 50.03  | 0.205 | 0.188 | 16.60  | 43.15  | 0.481 | 0.377 |
|                      | Sulfoxaflor      | 21.17  | 39.40  | 0.465 | 0.321 | 22.82  | 46.24  | 0.260 | 0.219 |
|                      | Imidacloprid     | 19.25  | 31.92  | 0.319 | 0.237 | 15.27  | 20.78  | 0.323 | 0.228 |
|                      | Acetamiprid      | 43.01  | 37.95  | 0.133 | 0.096 | 7.63   | 16.46  | 0.105 | 0.079 |
|                      | Cyantraniliprole | 18.52  | 25.19  | 0.139 | 0.131 | 37.95  | 47.39  | 0.235 | 0.172 |
|                      | Flupyradifurone  | 20.73  | 23.97  | 0.316 | 0.289 | 23.57  | 45.62  | 0.155 | 0.092 |

|                     |                  |       |       |       |       |       |        |       |       |
|---------------------|------------------|-------|-------|-------|-------|-------|--------|-------|-------|
|                     | Dinotefuran      | 18.90 | 10.25 | 0.314 | 0.271 | 41.63 | 49.33  | 0.198 | 0.165 |
| Squash #4<br>n=88   | Check            | 27.00 | 32.97 | 0.359 | 0.341 | 25.69 | 118.90 | 0.636 | 0.517 |
|                     | Pyriproxyfen     | 23.28 | 46.86 | 0.352 | 0.331 | 19.46 | 93.54  | 0.474 | 0.388 |
|                     | Clothianidin     | 24.18 | 44.00 | 0.210 | 0.210 | 10.49 | 103.37 | 0.397 | 0.386 |
|                     | Spiromesifen     | 27.09 | 40.88 | 0.121 | 0.109 | 17.81 | 75.21  | 0.332 | 0.313 |
|                     | Flonicamid       | 21.54 | 41.02 | 0.136 | 0.112 | 23.54 | 137.01 | 0.542 | 0.409 |
|                     | Sulfoxaflor      | 22.88 | 19.06 | 0.213 | 0.204 | 15.63 | 86.60  | 0.368 | 0.305 |
|                     | Imidacloprid     | 30.22 | 40.49 | 0.460 | 0.364 | 25.29 | 50.62  | 0.321 | 0.191 |
|                     | Acetamiprid      | 31.61 | 69.57 | 0.430 | 0.328 | 17.41 | 163.37 | 0.324 | 0.254 |
|                     | Cyantraniliprole | 19.25 | 42.94 | 0.542 | 0.493 | 18.44 | 73.00  | 0.350 | 0.269 |
|                     | Flupyradifurone  | 17.92 | 37.53 | 0.211 | 0.168 | 27.00 | 78.53  | 0.124 | 0.104 |
|                     | Dinotefuran      | 27.96 | 21.14 | 0.325 | 0.278 | 49.07 | 7.04   | 0.181 | 0.152 |
| Cucumber #4<br>n=88 | Check            | 19.17 | 31.55 | 0.434 | 0.413 | 10.72 | 72.28  | 0.503 | 0.467 |
|                     | Pyriproxyfen     | 26.24 | 25.09 | 0.437 | 0.417 | 40.32 | 40.06  | 0.247 | 0.206 |
|                     | Clothianidin     | 26.14 | 68.84 | 0.455 | 0.395 | 13.43 | 49.11  | 0.216 | 0.197 |
|                     | Spiromesifen     | 4.08  | 32.90 | 0.115 | 0.106 | 12.77 | 62.58  | 0.232 | 0.164 |
|                     | Flonicamid       | 11.99 | 50.03 | 0.305 | 0.279 | 16.60 | 43.15  | 0.499 | 0.479 |
|                     | Sulfoxaflor      | 21.17 | 39.40 | 0.069 | 0.053 | 22.82 | 46.24  | 0.252 | 0.244 |
|                     | Imidacloprid     | 19.25 | 31.92 | 0.138 | 0.125 | 15.27 | 20.78  | 0.171 | 0.159 |
|                     | Acetamiprid      | 43.01 | 37.95 | 0.322 | 0.287 | 7.63  | 16.46  | 0.246 | 0.242 |
|                     | Cyantraniliprole | 18.52 | 25.19 | 0.212 | 0.184 | 37.95 | 47.39  | 0.099 | 0.091 |
|                     | Flupyradifurone  | 20.73 | 23.97 | 0.000 | 0.000 | 23.57 | 45.62  | 0.000 | 0.000 |
|                     | Dinotefuran      | 18.90 | 10.25 | 0.116 | 0.103 | 41.63 | 49.33  | 0.151 | 0.135 |
